# Supplementary material
Source: Springer Nature journal article supplement (https://www.springermedizin.de/resource/supplementary/12913_2004_130_MOESM3_ESM.pdf/9534260)

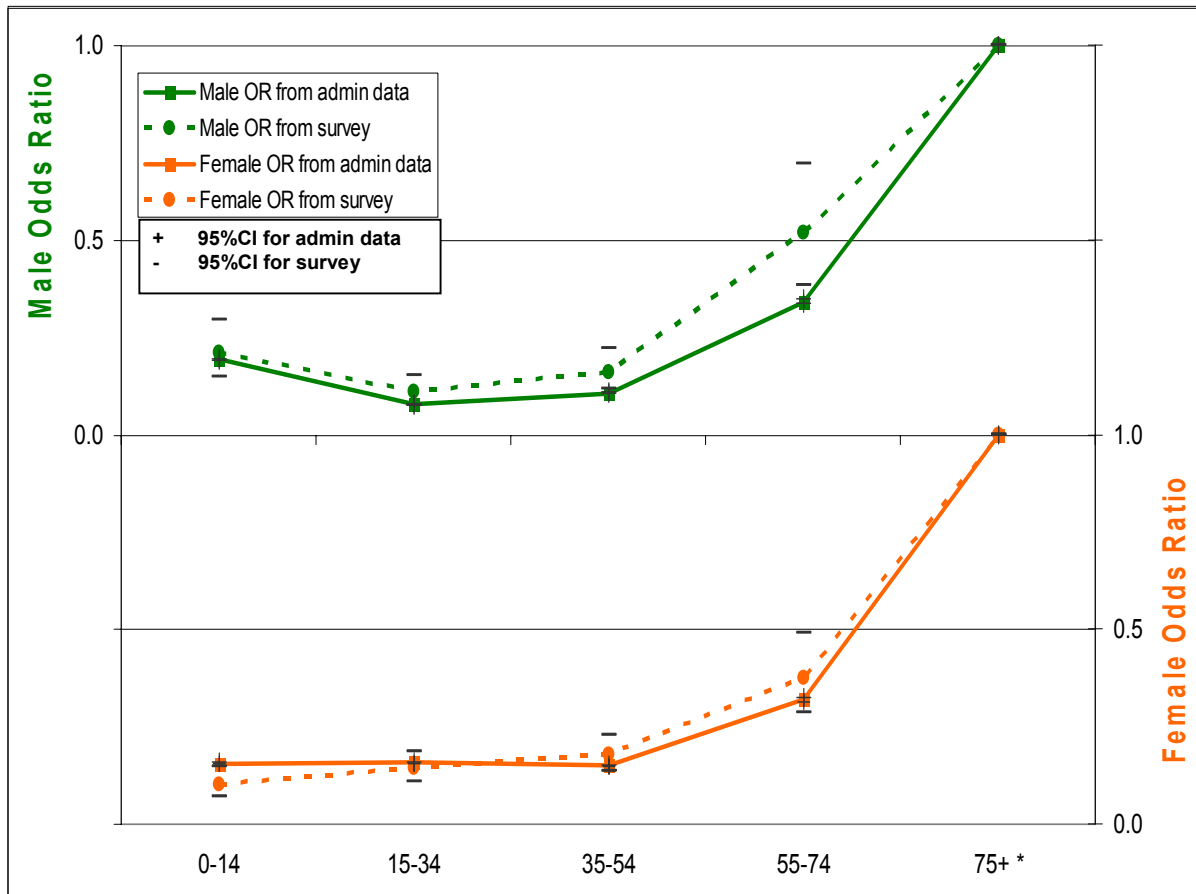

\* Age 75+ as reference group

Supplement: MOESM3 [file 9534260]
